# Supplementary material for: Enhanced power factor and suppressed lattice thermal conductivity of CoSb3 skutterudite via Ni substitution and nanostructuring for high thermoelectric performance
Source: Royal Society of Chemistry journal article supplement (doi:10.1039/d4nj00494a), 2024-01-01
Supplement: d4nj00494a1.pdf [file d4nj00494a1.pdf]

## SUPPORTING INFORMATION (SI)

### Enhanced power factor and suppressed lattice thermal conductivity of CoSb<sub>3</sub> Skutterudite by Ni substitution and nanostructuring for high thermoelectric performance

R. Annie Victoria Rose<sup>a</sup>, D. Sidharth<sup>b</sup>, M. Arivanandhan<sup>a\*</sup>, R. Jayavel<sup>c</sup>

<sup>a</sup>Centre for Nanoscience and Technology, Anna University, Chennai- 600025, India

<sup>b</sup>Institute of Physics, Academia Sinica, Taipei 11529, Taiwan.

<sup>c</sup>Crystal Growth Centre, Anna University, Chennai 600025, Tamil Nadu, India.

\*Corresponding Author: M. Arivanandhan ([arivucz@gmail.com](mailto:arivucz@gmail.com))

Table S1: Cp values of pure and Ni substituted samples as a function of temperature.

| Temperature (K) | Cp (J/g*K)<br>for Pure | Cp (J/g*K) for<br>Co <sub>0.98</sub> Ni <sub>0.02</sub> Sb <sub>3</sub> | Cp (J/g*K) for<br>Co <sub>0.96</sub> Ni <sub>0.04</sub> Sb <sub>3</sub> | Cp (J/g*K) for<br>Co <sub>0.94</sub> Ni <sub>0.06</sub> Sb <sub>3</sub> |
|-----------------|------------------------|-------------------------------------------------------------------------|-------------------------------------------------------------------------|-------------------------------------------------------------------------|
| 323             | 0.659                  | 0.546                                                                   | 0.430                                                                   | 0.316                                                                   |
| 384             | 0.694                  | 0.583                                                                   | 0.476                                                                   | 0.372                                                                   |
| 423             | 0.696                  | 0.612                                                                   | 0.529                                                                   | 0.446                                                                   |
| 483             | 0.733                  | 0.649                                                                   | 0.568                                                                   | 0.487                                                                   |
| 523             | 0.711                  | 0.656                                                                   | 0.605                                                                   | 0.551                                                                   |
| 544             | 0.756                  | 0.702                                                                   | 0.649                                                                   | 0.597                                                                   |

Table S2. Represent the crystallite size (nm), microstrain ( $\epsilon$ ) and dislocation density ( $\delta$ ) of the prepared material.

| Sample                                                | Crystallite<br>size (nm) | Microstrain( $\epsilon$ ) | Dislocation density ( $\delta$ )<br>(lines/nm <sup>2</sup> ) |
|-------------------------------------------------------|--------------------------|---------------------------|--------------------------------------------------------------|
| Pure CoSb <sub>3</sub>                                | 48.52                    | 0.151                     | 4.2 x 10 <sup>-4</sup>                                       |
| Co <sub>0.98</sub> Ni <sub>0.02</sub> Sb <sub>3</sub> | 48.52                    | 0.151                     | 4.2 x 10 <sup>-4</sup>                                       |
| Co <sub>0.96</sub> Ni <sub>0.04</sub> Sb <sub>3</sub> | 43.41                    | 0.169                     | 5.3 x 10 <sup>-4</sup>                                       |

|                                               |       |       |                      |
|-----------------------------------------------|-------|-------|----------------------|
| $\text{Co}_{0.94}\text{Ni}_{0.06}\text{Sb}_3$ | 45.83 | 0.159 | $4.7 \times 10^{-4}$ |
| $\text{Co}_{0.92}\text{Ni}_{0.08}\text{Sb}_3$ | 44.34 | 0.165 | $5.0 \times 10^{-4}$ |

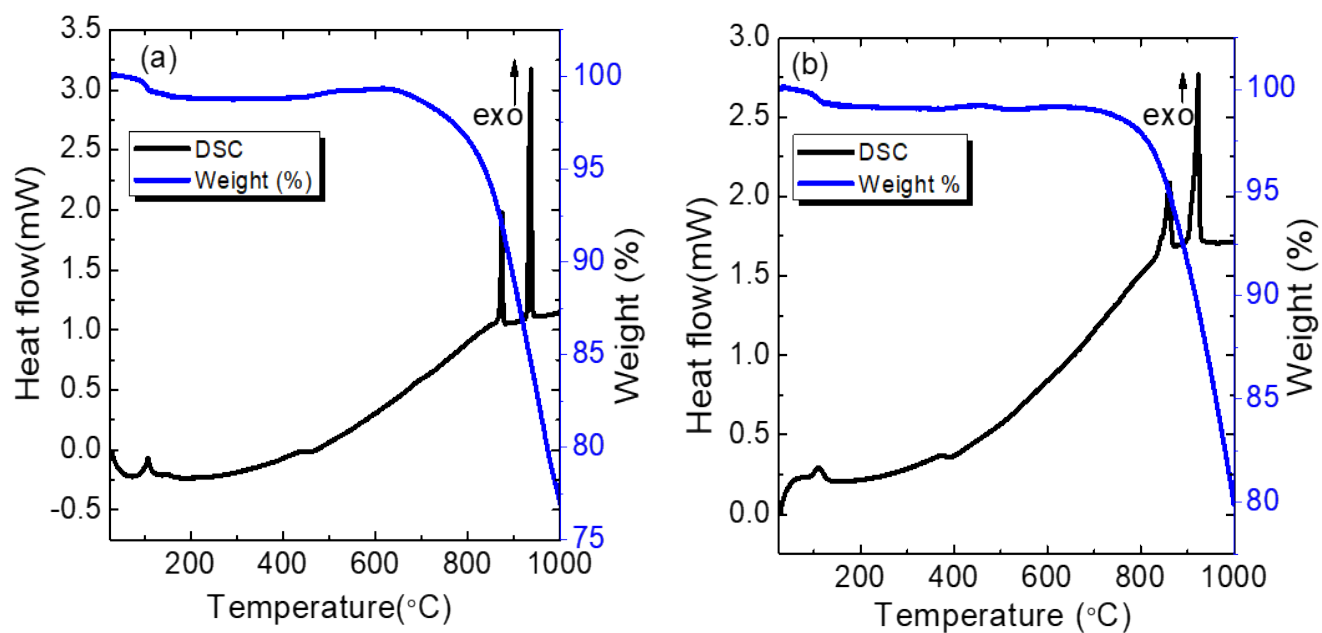

Figure S1 TGA /DSC of (a) pure  $\text{CoSb}_3$  and (b)  $\text{Co}_{0.94}\text{Ni}_{0.06}\text{Sb}_3$  samples.

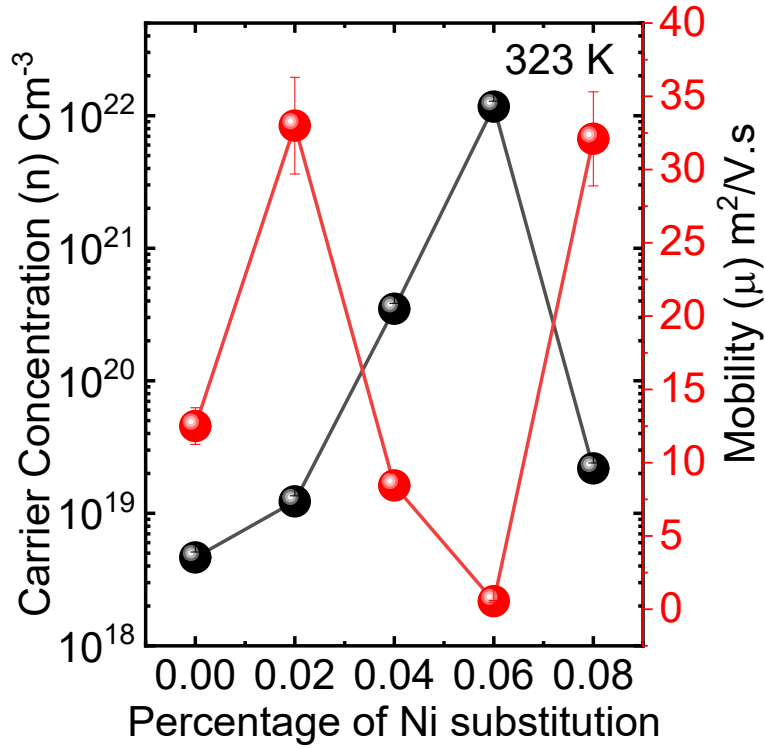

Figure S2 Variation of Carrier concentration (n) and mobility ( $\mu$ ) of the Ni substituted samples as a function of Ni content at 323 K.

Table S3. Comparison of Thermoelectric parameters with the previous literatures of similar materials.

| Materials                                               | $\sigma$ ( $\Omega\text{m}$ ) <sup>-1</sup> | S ( $\mu\text{V}/\text{K}$ ) | Power Factor (W/mK <sup>2</sup> ) | $\kappa$ (W/mK) | zT           | References |
|---------------------------------------------------------|---------------------------------------------|------------------------------|-----------------------------------|-----------------|--------------|------------|
| <b>Co<sub>0.93</sub>Ni<sub>0.07</sub>Sb<sub>3</sub></b> | 10 <sup>5</sup>                             | -194                         | -                                 | 0.5             | 0.2 at 650 K | [31]       |
| <b>Bi<sub>0.5</sub>Co<sub>4</sub>Sb<sub>12</sub></b>    | 3 × 10 <sup>4</sup>                         | -205                         | 1.4 × 10 <sup>-3</sup>            | 3.02            | 0.53 at 632K | [51]       |
| <b>CoSb<sub>3</sub></b>                                 | 19 × 10 <sup>4</sup>                        | 155                          | 1.4 × 10 <sup>-3</sup>            | 1.6             | 0.47 at 660K | [52]       |

|                                                                                         |                    |      |                       |     |                    |              |
|-----------------------------------------------------------------------------------------|--------------------|------|-----------------------|-----|--------------------|--------------|
| <b>Co<sub>0.95</sub>Ni<sub>0.05</sub>Sn<sub>1.5</sub>Te<sub>1.5</sub></b>               | 2                  | -250 | $1.9 \times 10^{-3}$  | 2   | 0.73<br>at<br>773K | [53]         |
| <b>Se<sub>0.05</sub>Ni<sub>0.4</sub>Co<sub>3.6</sub>Sb<sub>12</sub></b>                 | $8 \times 10^4$    | -103 | $2.7 \times 10^{-3}$  | 3.4 | 0.71<br>at<br>823K | [54]         |
| <b>Co<sub>0.91</sub>Ni<sub>0.09</sub>Sb<sub>3</sub></b>                                 | $7 \times 10^4$    | -150 | -                     | 3.2 | 0.70<br>at<br>573K | [55]         |
| <b>S<sub>0.25</sub>Co<sub>3.4</sub>Ni<sub>0.6</sub>Sb<sub>12</sub></b>                  | $17.9 \times 10^4$ | -170 | $3.4 \times 10^{-3}$  | 2.7 | 0.81<br>at<br>800K | [30]         |
| <b>Dy<sub>0.4</sub>Co<sub>3.2</sub>Ni<sub>0.8</sub>Sb<sub>12</sub></b>                  | $1.63 \times 10^5$ | -180 | $5.2 \times 10^{-3}$  | 2.3 | 1.4 at<br>773K     | [25]         |
| <b>Ba<sub>0.08</sub>La<sub>0.05</sub>Yb<sub>0.04</sub>Co<sub>4</sub>Sb<sub>12</sub></b> | $2.39 \times 10^4$ | -126 | $5.5 \times 10^{-3}$  | 2.7 | 1.7 at<br>850K     | [24]         |
| <b>0.2Co/Ba<sub>0.3</sub>In<sub>0.3</sub>Co<sub>4</sub>Sb<sub>12</sub></b>              | $13 \times 10^4$   | -210 | -                     | 2.6 | 1.8 at<br>850K     | [23]         |
| <b>Co<sub>0.94</sub>Ni<sub>0.06</sub>Sb<sub>3</sub></b>                                 | $1.16 \times 10^5$ | -213 | $5.27 \times 10^{-3}$ | 3.6 | 0.78<br>at<br>553K | Present work |
| <b>Co<sub>0.96</sub>Ni<sub>0.04</sub>Sb<sub>3</sub></b>                                 | $5.44 \times 10^4$ | -342 | $6.40 \times 10^{-3}$ | 2.0 | 1.72<br>at<br>553K | Present work |
